# Supplementary material
Source: PubMed Central journal article supplement (PMC5510332)
Supplement: NIHMS873699-supplement-1.pdf [file NIHMS873699-supplement-1.pdf]

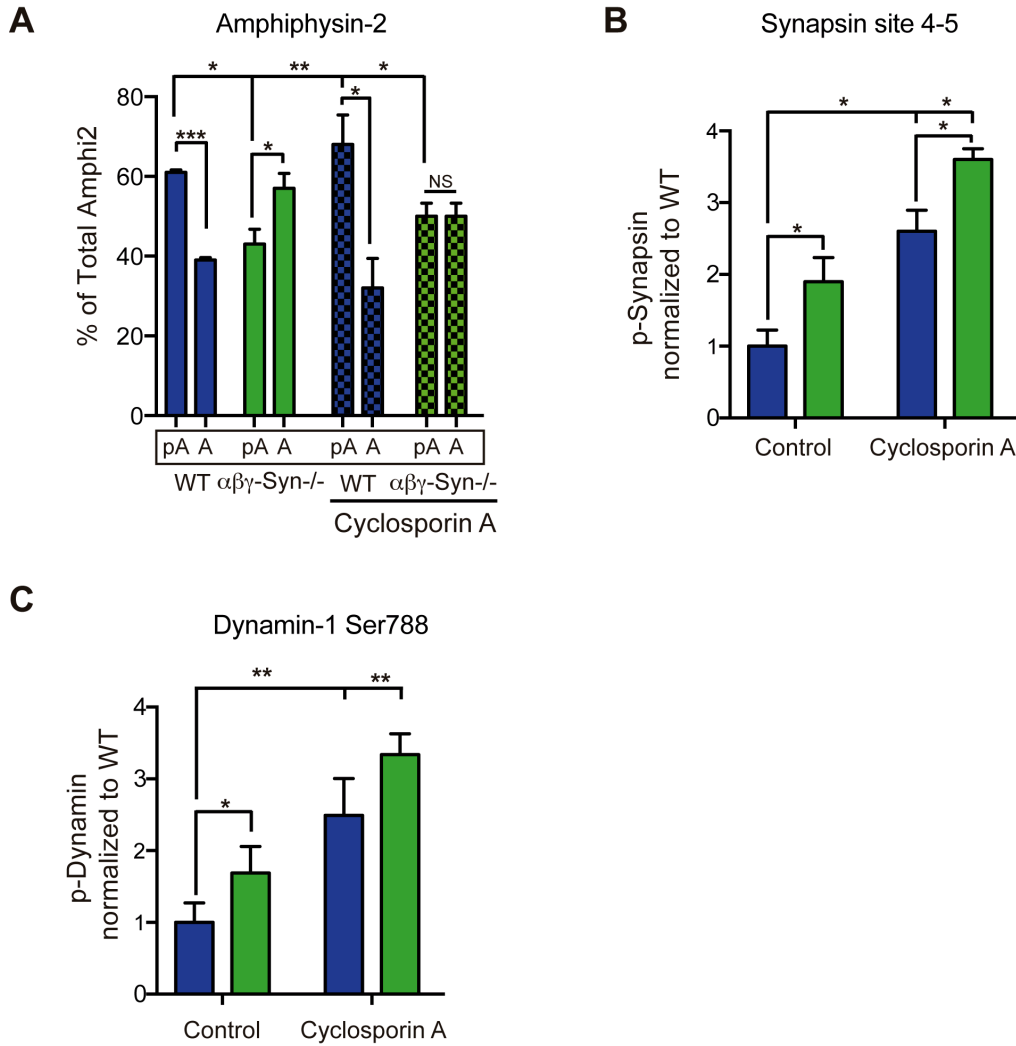

**Supplementary Figure 1: Phosphorylation of endocytic proteins is regulated by Calcineurin in wild type and  $\alpha\beta\gamma$ -Syn<sup>-/-</sup> brains, related to Figure 6. A.** The decrease in amphiphysin-2 phosphorylation  $\alpha\beta\gamma$ -Syn<sup>-/-</sup> is reverted by the use of 1  $\mu$ M Cyclosporin A, a calcineurin inhibitor. While the phosphorylation in wild type is further increased upon treatment with cyclosporin A. **B-C.** The increase in phosphorylation of Synapsin site 4-5 and Dynamin-1 Ser788 is enhanced by treatment with Cyclosporin A. N = 3 independent experiments. NS, not significant, \* p<0.05; \*\* p<0.01; \*\*\* p<0.001.

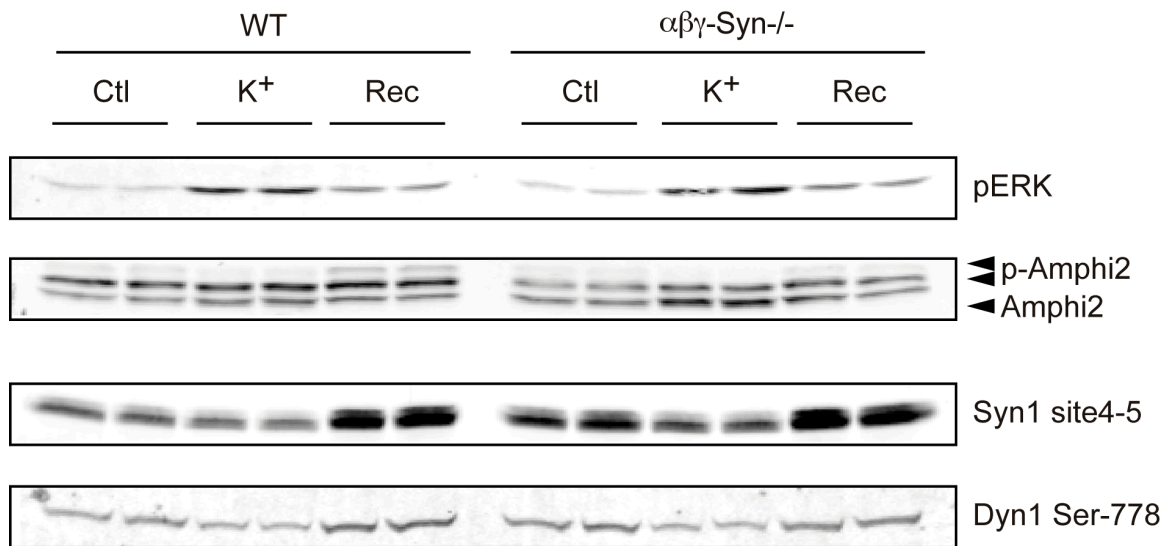

**Supplementary Figure 2: Reversible phosphorylation of synaptic proteins, related to Figure 6.** Wild type (WT) and synuclein triple knock out ( $\alpha\beta\gamma$ -Syn<sup>-/-</sup>) synaptosomes were in control conditions (Ctl) and subsequently were subjected to KCl simulation (K<sup>+</sup>) and allowed to recover (Rec). These samples were used for western blot using specific antibodies for phosphorylated ERK (pERK), Amphiphysin-2 (Amphi-2), the phosphorylation sites 4 and 5 in synapsin and the phosphorylation in the serine 778 in Dynamin-1. N = 3 independent experiments.

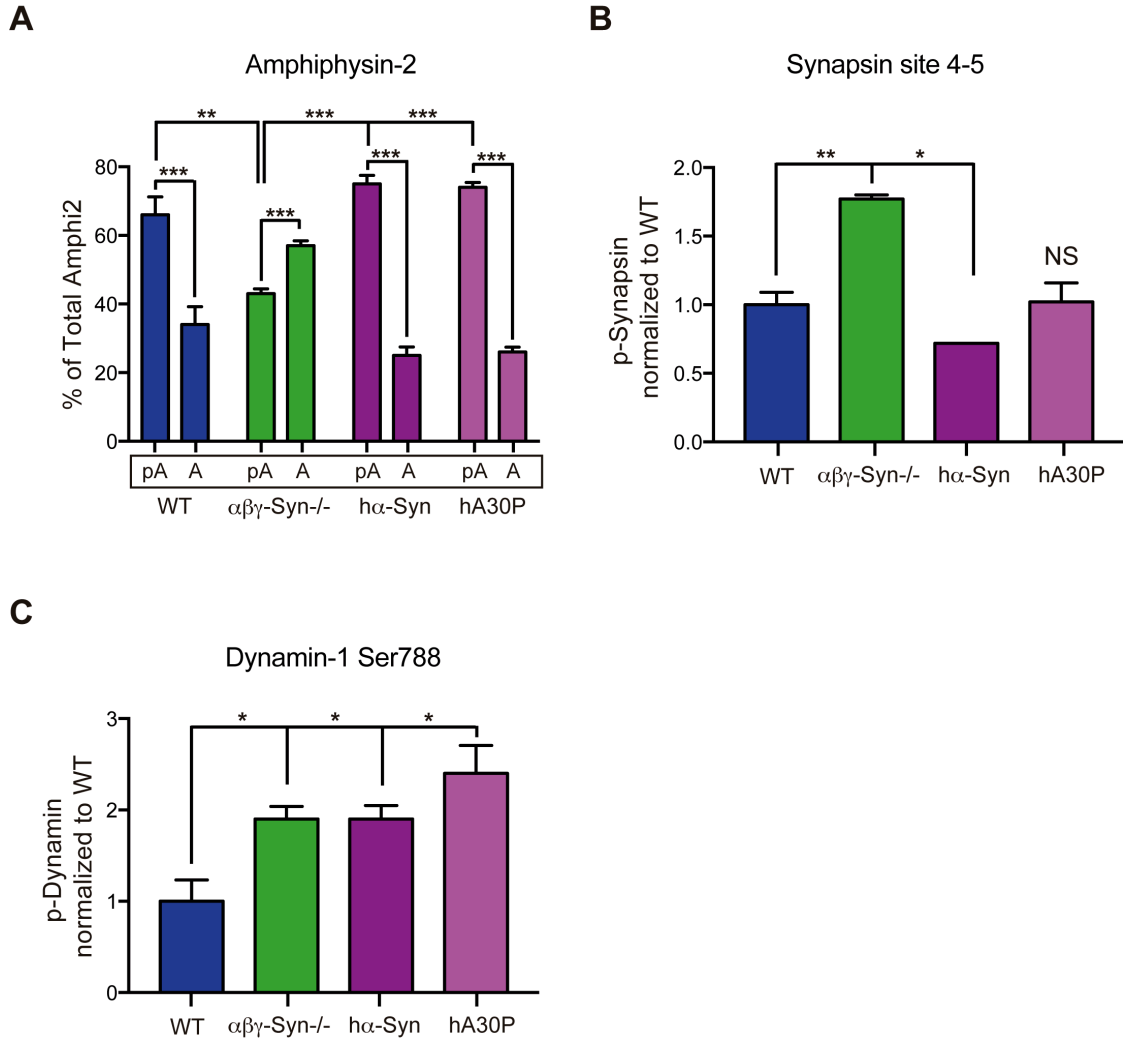

**Supplementary Figure 3: Phosphorylation of endocytic proteins in the different synuclein genotypes, related to Figure 6.** **A.** Quantification of phosphor- and dephospho- amphiphysin-2 in the four genotypes. The phosphorylation pattern of amphiphysin-2 in h $\alpha$ -Syn or hA30P is similar to wild type. **B.** The phosphorylation of Synapsin site 4-5 in  $\alpha\beta\gamma$ -Syn<sup>-/-</sup> is increased compared to wildtype as shown in Fig. 6E. In h $\alpha$ -Syn mutant synapses is decreased relative to WT and the hA30P mutant is indistinguishable from WT. **C.** The phosphorylation of Dynamin-1 Ser788 is increased in all three genotypes relative to WT. N = 3 independent experiments. NS, not significant, \* p<0.05; \*\* p<0.01; \*\*\* p<0.001.

| Name       | Aminoacid | Kinase      | Phosphatase      | Function                    | References                                        |
|------------|-----------|-------------|------------------|-----------------------------|---------------------------------------------------|
| Syn1Site-1 | Ser 9     | PKACaMKI    | PP2A             | Resting pool maintenance    | Czernik et al., 1987                              |
| Syn1Site-2 | Ser 566   | CaMKII      | PP2A             |                             | Hutter and Greengard, 1979;<br>Sihra et al., 1989 |
| Syn1Site-3 | Ser 603   | CaMKII      | PP2A             |                             |                                                   |
| Syn1Site-4 | Ser 62    | MAPK        | PP2B Calcineurin |                             |                                                   |
| Syn1Site-5 | Ser 67    | MAPK        | PP2B Calcineurin |                             | Jovanovic et al., 1996<br>Matsubara et al., 1996  |
| Syn1Site-6 | Ser 549   | MAPK cdk1/5 | PP2B Calcineurin |                             | Jovanovic et al., 2001                            |
| Syn1Site-7 | Ser 551   | cdk1/5      |                  |                             |                                                   |
| Dyn1 744   | Ser 774   | cdk5 GSK3   | Calcineurin      | Synaptic vesicle scission   | Tan et al., 2003<br>Clayton et al., 2010          |
| Dyn1 788   | Ser 9     | cdk5        | Calcineurin      |                             |                                                   |
| Amphi-1    | Ser 262   | cdk5        | Calcineurin      | Membrane curvature          | Liang et al., 2007                                |
| Amphi-1    | Ser 272   | cdk5        | Calcineurin      |                             |                                                   |
| Amphi-1    | Ser 276   | cdk5        | Calcineurin      |                             |                                                   |
| Amphi-1    | Ser 285   | cdk5        | Calcineurin      |                             |                                                   |
| Amphi-1    | Thr 310   |             | Calcineurin      |                             |                                                   |
| Amphi-1    | Thr 350   | CK2         | Calcineurin      | Clathrin binding inhibition | Doring et al., 2006                               |
| Amphi-1    | Thr 387   | CK2         | Calcineurin      |                             |                                                   |
| Amphi-2    | Serines   | cdk5        | Calcineurin      | Membrane curvature          |                                                   |
| Epsin      | Ser 357   | cdc2 kinase | Calcineurin      | Clathrin binding inhibition | Chen et al., 1999                                 |
| EndoA1     | Ser 75    | LRRK2       |                  | Membrane curvature          | Ambroso et al., 2014                              |
| EndoB1     |           | cdk5        |                  | Autophagy                   | Wong et al., 2011                                 |

**Table I. Phosphorylation of endocytic protein related to synaptic vesicle endocytosis, related to Figure 6.** Different presynaptic proteins are phosphorylated in normal conditions and dephosphorylated upon stimulation of neurons in a calcium dependent manner. Here we compile the names of the phosphorylated proteins (name), the phosphorylated amino acid residue when available (amino acid), the described kinase (kinase) and phosphatase (phosphatase) in the literature, associated and putative functions (function) and the references where these antecedents are shown (reference).

| Identifier                              | n  | Pearson's r | p-Value | Slope | Intercept |
|-----------------------------------------|----|-------------|---------|-------|-----------|
| WT                                      | 26 | -0.41       | 0.0352  | -0.21 | 3.50      |
| $\alpha\beta\gamma$ -Syn <sup>-/-</sup> | 56 | -0.43       | 0.0008  | -0.27 | 5.09      |
| h $\alpha$ syn                          | 27 | -0.22       | 0.2689  | -0.07 | 2.51      |
| hA30P                                   | 58 | -0.40       | 0.0016  | -0.26 | 4.64      |

**Table II. Correlation between the number of tethers and the vesicle distance to the AZ membrane, related to Figures 3 and 7.** Pearson correlation analysis was carried on using the number of tethers and the vesicle distance to the AZ for different genotypes: Wild type (WT), synuclein triple knock out ( $\alpha\beta\gamma$ -Syn<sup>-/-</sup>), human  $\alpha$ -synuclein (h $\alpha$ -Syn) or A30P (hA30P) mutation expressed in a wild type genotype. The value 'n' is the number of data per condition, 'r' is the Pearson correlation coefficient, 'p-Value' is the statistical confidence that the result is significant, 'slope' is the slope of the correlation line and 'Intercept' is the intercept in Y axis. We see here that the only case these variables are not correlated is when human  $\alpha$ -synuclein overexpressed.

|                         | WT | $\alpha\beta\gamma$ -Syn <sup>-/-</sup> | h $\alpha$ -Syn | hA30P |
|-------------------------|----|-----------------------------------------|-----------------|-------|
| Synapse Size            | -  | ↓                                       | ↑               | ↑     |
| Tethering               | -  | ↑                                       | -               | -     |
| Tether/SV               | -  | ↑                                       | -               | ↑     |
| RRP                     | -  | ↑                                       | -               | ↑     |
| Intermediate Connectors | -  | ↓                                       | -               | -     |
| Proximal Connectors     | -  | ↓                                       | -               | -     |
| Synapsin site 4-5       | -  | ↑                                       | ↓               | -     |
| p-Amphiphysin           | -  | ↓                                       | -               | -     |
| Dyn-1 Ser788            | -  | ↑                                       | ↑               | ↑     |

**Table III. Summary of morphological and phosphorylation changes observed in synapses with different synuclein genotypes, related to all Figures.** We observed different ultrastructural and phosphorylation changes when analyzing wild type (WT),  $\alpha\beta\gamma$ -Syn<sup>-/-</sup>, h $\alpha$ -Syn or hA30P mutation expressed in a wild type genotype. Direction in the arrow represents and increase or decrease and a line represent no change compare to wild type.

| Identifier                                                | Animals | Synapses | SVs | Proximal SVs | Tethers | Connectors |
|-----------------------------------------------------------|---------|----------|-----|--------------|---------|------------|
| WT                                                        | 3       | 8        | 648 | 47           | 50      | 1103       |
| $\alpha\beta\gamma$ -Syn <sup>-/-</sup>                   | 3       | 6        | 611 | 67           | 163     | 636        |
| h $\alpha$ syn                                            | 2       | 6        | 535 | 38           | 53      | 1089       |
| hA30P                                                     | 3       | 9        | 763 | 81           | 162     | 1334       |
| $\alpha\beta\gamma$ -Syn <sup>-/-</sup><br>h $\alpha$ syn | 2       | 7        | 618 | 58           | -       | 1845       |

**Table IV. Summary of data analyzed in CryoEM experiments, related to Figures 3, 4 and 7.** Number of animals, synapses, synaptic vesicles (SVs), tethers and connectors analyzed for the denoted genotypes.
